- of halothane and nitrous oxide on dorsal horn neurons ("the spinal gate"). *ANESTHESIOLOGY* 31:205-212, 1969
11. deJong RH, Robles R, Heavner JE: Suppression of impulse transmission in the cat's dorsal horn by inhalation anesthetics. *ANESTHESIOLOGY* 32:440-445, 1970
  12. Kitahata LM, Taub A, Sato I: Lamina-specific suppression of dorsal horn unit activity by nitrous oxide and by hyperventilation. *J Pharmacol Exp Ther* 176:101-108, 1971
  13. Pomeranz B, Wall PD, Weber WV: Cord cells responding to fine myelinated afferents from viscera, muscle and skin. *J Physiol* 199: 511-532, 1968
  14. Hillman P, Wall PD: Inhibitory and excitatory factors influencing the receptive fields of lamina 5 spinal cord cells. *Exp Brain Res* 9:284-306, 1969
  15. Selzer M, Spencer WA: Convergence of visceral and cutaneous afferent pathways in the lumbar spinal cord. *Brain Res* 14:331-348, 1969
  16. Kitahata LM, Taub A, Collins WF, et al: Effects of ketamine on dorsal horn spinal neurons. *Fed Proc* 31:386, 1972
  17. Christensen BN, Perl ER: Spinal neurons specifically excited by noxious or thermal stimuli: Marginal zone of the dorsal horn. *J Neurophysiol* 33:293-307, 1970
  18. Taub A: Local, segmental and supraspinal interaction with a dorsolateral spinal cutaneous afferent system. *Exp Neurol* 10:357-374, 1964
  19. Kitahata LM, Taub A, Sato I: Hyperventilation and spinal reflexes. *ANESTHESIOLOGY* 31:321-326, 1969
  20. Conseiller C, Benoist JM, Hamman KF, et al: Effects of ketamine (CI 581) on cell responses to cutaneous stimulations in laminae IV and V in the cat's dorsal horn. *Eur J Pharmacol* 18:346-352, 1972

## Metabolism

**CATECHOLAMINE EXCRETION IN CYANOTIC CONGENITAL HEART DISEASE** Urinary catecholamines were studied in 23 normal children 13 days to 14 years of age and 25 children with cyanotic heart disease 3 days to 10 years of age.

Significant elevations of dopamine (DA) and combined metanephrine and normetanephrine (MN + NMN) were found in the cyanotic group. Epinephrine (E), norepinephrine (NE) and 3-methoxy-4-hydroxymandelic acid (VMA) values showed no significant differences, but the cyanotic children tended to have higher values than normal. The increase of the precursor DA and of the principal metabolites MN + NMN plus the tendency to high urinary levels of E and NE make it probable that the cyanotic children had increased endogenous secretion of E and NE.

The authors speculate regarding the significance of the increases of E and NE in the cyanotic child: 1) enhancement of positive inotropic myocardial effect; in individuals with outflow tract obstruction from either ventricle this may result in an even larger reduction of pulmonary blood flow and an increase in hypoxemia; 2) increased tissue oxygen consumption; in the presence of oxygen deprivation the resulting metabolic acidemia may be the single most important element in the morbidity and mortality of the neonate. (Folger, G. M., Jr., and Hollowell, J. G.: *Excretion of Catecholamine in Urine by Infants and Children with Cyanotic Congenital Heart Disease, Pediat. Res.* 6: 151-157, 1972.)
